# Supplementary material for: Managing intensive care admissions when there are not enough beds during the COVID-19 pandemic: a systematic review
Source: HighWire-hosted journal article supplement (doi:10.1136/thoraxjnl-2020-215518), 2020-12-17
Supplement: thoraxjnl-2020-215518supp001_data_supplement.pdf [file thoraxjnl-2020-215518supp001_data_supplement.pdf]

## **Appendix 1 – Search strategies**

### **Medline via PubMed**

No limits by publication year or language

((extracorporeal membrane oxygenation or ECMO or Oxygenation support or acute respiratory distress syndrome or ARDS or extracorporeal organ support or CCU or ITU or ICU or HDU or (critical care or intensive care) or (high dependency) or (ventilat\* or respirator\* or ((mechanical or artificial) and (respiration\* or breath\*)) ) or front line))

AND

(Planning or provision or resource allocation or (patient and selection) or indications or preparing or priorit\* or ration\* or ethics or patient assessment or withholding treatment or withholding care) or triag\* or admission or medical assessment or patient acuity or sorting )

AND

((COVID-19 or COVID19 or 2019-nCoV or SARS-CoV-2 or ((corona virus or coronavirus) and (new or novel or pneumonia or respirat\* or "2019" or epidemic or pandemic))))

### **Medline via OVID**

Ovid MEDLINE(R) and Epub Ahead of Print, In-Process & Other Non-Indexed Citations, Daily and Versions(R) 1946 to March 26, 2020

No limits by publication year or language

((extracorporeal membrane oxygenation or ECMO or Oxygenation support or acute respiratory distress syndrome or ARDS or extracorporeal organ support or CCU or ITU or ICU or HDU or (critical care or intensive care) or (high dependency) or (ventilat\* or respirator\* or ((mechanical or artificial) and (respiration\* or breath\*)) ) or front line)).ti,ab,kw,tw. Or exp extracorporeal membrane oxygenation/ or exp oxygen inhalation therapy/ or exp respiratory distress syndrome, adult/ or exp critical care/ or exp intensive care units/ or exp ventilators, mechanical/ or exp respiration, artificial/ AND

(Planning or provision or resource allocation or (patient and selection) or indications or preparing or priorit\* or ration\* or ethics or patient assessment or withholding treatment or withholding care or triag\* or admission or medical assessment or patient acuity or sorting).ti,ab,kw,tw. Or exp \*patient care planning/ or exp \*resource allocation/ or exp \*patient selection/ or exp \*decision making/ or exp \*patient acuity/ or exp \*patient assessment/ or exp \*medical assessment/ or exp \*hospital admission/ AND

((COVID-19 or COVID19 or 2019-nCoV or SARS-CoV-2 or ((corona virus or coronavirus) adj5 (new or novel or pneumonia or respirat\* or "2019" or epidemic or pandemic))).ti,ab,kw,tw.)

### **Embase**

Embase 1974 to 2020 March 26<sup>th</sup>

No limits by language

((extracorporeal membrane oxygenation or ECMO or Oxygenation support or acute respiratory distress syndrome or ARDS or extracorporeal organ support or CCU or ITU or ICU or HDU or (critical care or intensive care) or (high dependency) or (ventilat\* or respirator\* or ((mechanical or artificial) and (respiration\* or breath\*)) ) or front line)).ti,ab,kw,tw. Or exp \*extracorporeal oxygenation/ or exp \*oxygen therapy/ or exp \*respiratory distress syndrome/ or exp critical care/ or exp \*intensive

care units/ or exp \*intensive care/ or exp \*high dependency unit/ or exp \*mechanical ventilator/ or exp \*artificial ventilation/ or exp \*ventilator/

AND

(Planning or provision or resource allocation or (patient and selection) or indications or preparing or priorit\* or ration\* or ethics or patient assessment or withholding treatment or withholding care or triag\* or admission or medical assessment or patient acuity or sorting).ti,ab,kw,tw. Or exp \*patient care planning/ or exp \*resource allocation/ or exp \*patient selection/ or exp \*decision making/ or exp \*patient acuity/ or exp \*patient assessment/ or exp \*medical assessment/ or exp \*hospital admission/

AND

((COVID-19 or COVID19 or 2019-nCoV or SARS-CoV-2 or ((corona virus or coronavirus) adj5 (new or novel or pneumonia or respirat\* or "2019" or epidemic or pandemic))).ti,ab,kw,tw.)

### Web of Science Core Collection

No limits by publication year or language

Searches run 27<sup>th</sup> March 2020

((extracorporeal membrane oxygenation or ECMO or Oxygenation support or acute respiratory distress syndrome or ARDS or extracorporeal organ support or CCU or ITU or ICU or HDU or (critical care or intensive care) or (high dependency) or (ventilat\* or respirator\* or ((mechanical or artificial) and (respiration\* or breath\*))) or front line))

AND

(Planning or provision or resource allocation or (patient and selection) or indications or preparing or priorit\* or ration\* or ethics or patient assessment or withholding treatment or withholding care or triag\* or admission or medical assessment or patient acuity or sorting)

AND

(COVID-19 or COVID19 or 2019-nCoV or SARS-CoV-2 or ((corona virus or coronavirus) and (new or novel or pneumonia or respirat\* or "2019" or epidemic or pandemic)))

### Global Health

No limits by publication year or language

Searches run 27<sup>th</sup> March 2020

((((extracorporeal membrane oxygenation or ECMO or Oxygenation support or acute respiratory distress syndrome or ARDS or extracorporeal organ support or CCU or ITU or ICU or HDU or (critical care or intensive care) or (high dependency) or (ventilat\* or respirator\* or ((mechanical or artificial) n3 (respiration\* or breath\*))) or front line))

AND

(Planning or provision or resource allocation or ("patient selection") or indications or preparing or priorit\* or ration\* or ethics or patient assessment or withholding treatment or withholding care) or triag\* or admission or medical assessment or patient acuity or sorting )

AND

((COVID-19 or COVID19 or 2019-nCoV or SARS-CoV-2 or ((corona virus or coronavirus) n5 (new or novel or pneumonia or respirat\* or "2019" or epidemic or pandemic))))

## Medrxiv

Searches run on 2<sup>nd</sup> April 2020

- a. (covid19 or covid-19 or coronavirus or corona virus) and (triage or assess or priority) and (itu or ccu or icu)
- b. (covid19 or covid-19 or coronavirus or corona virus) and (acuity or admit or admission) and (itu or ccu or icu)
- c. (covid19 or covid-19 or coronavirus or corona virus) and (triage or assess or priority) and (critical care or intensive care)
- d. (covid19 or covid-19 or coronavirus or corona virus) and (acuity or admit or admission) and (critical care)
- e. (covid19 or covid-19 or coronavirus or corona virus) and (acuity or admit or admission) and (intensive care)
- f. (covid19 or covid-19 or coronavirus or corona virus) and (triage or assess or priority) and (high dependency)
- g. (covid19 or covid-19 or coronavirus or corona virus) and (acuity or admit or admission) and (high dependency)
- h. (covid19 or covid-19 or coronavirus or corona virus) and (acuity or admit or admission) and (ventilat\* or respirator\*)
- i. (covid19 or covid-19 or coronavirus or corona virus) and (triage or assess or priority) and (ventilat\* or respirator\*)
- j. (covid19 or covid-19 or coronavirus or corona virus) and (acuity or admit or admission) and (front line)
- k. (covid19 or covid-19 or coronavirus or corona virus) and (triage or assess or priority) and (front line)
- l. (covid19 or covid-19 or coronavirus or corona virus) and (acuity or admit or admission) and (mechanical respiration )
- m. (covid19 or covid-19 or coronavirus or corona virus) and (triage or assess or priority) and (mechanical respiration)
- n. (covid19 or covid-19 or coronavirus or corona virus) and (acuity or admit or admission) and (mechanical or artificial)
- o. (covid19 or covid-19 or coronavirus or corona virus) and (triage or assess or priority) and (mechanical or artificial)
- p. (covid19 or covid-19 or coronavirus or corona virus) and (acuity or admit or admission) and (artificial respiration)
- q. (covid19 or covid-19 or coronavirus or corona virus) and (triage or assess or priority) and (artificial respiration)

## Google.com searches

Searched from within the UK

Cleared browsing history

Searched from 1<sup>st</sup> January 2020 onwards

Search done on 31<sup>st</sup> March 2020

First 100 hits (10 pages) in each of four searches

allintext: ventilator triage OR assessment OR priority OR acuity OR admission OR ration OR preparing "covid 19" filetype:pdf

allintext: "intensive care" triage OR assessment OR priority OR acuity OR admission OR ration OR preparing "covid 19" filetype:pdf

allintext: "critical care" triage OR assessment OR priority OR acuity OR admission OR ration OR preparing "covid 19" filetype:pdf

allintext: "high dependency" triage OR assessment OR priority OR acuity OR admission OR ration OR preparing "covid 19" filetype:pdf
